# Supplementary material for: Three new natural secondary reference materials for in situ andradite U–Pb geochronology
Source: Royal Society of Chemistry journal article supplement (doi:10.1039/d4ja00290c), 2024-12-06
Supplement: d4ja00290c2.pdf [file d4ja00290c2.pdf]

## Supporting Information

Table 1S Individual andradite U–Pb dating results by LA–(Q, SF)–ICP–MS and SIMS investigated in this study.

Table 2S Average chemical compositions of the studied andradite samples.
